# Supplementary material for: Tsunami Vulnerability Mapping of Coastal Areas to Confront the Banda Detachment Tsunami (Case Study at Tual City)
Source: Copernicus journal article supplement (doi:10.5194/egusphere-2023-3021), 2024-01-25
Supplement: Supplementary file [file egusphere-2023-3021-RC2-supplement.pdf]

## **NHESS manuscript egosphere-2023-3021-- Tsunami Vulnerability Mapping of Coastal Areas to Confront the Banda Detachment Tsunami (Case Study at Tual City)**

This study presents an approach to establishing the tsunami hazard map of Tual City, which is undoubtedly an interesting and meaningful research topic. However, despite its potential, I find myself unable to support the publication of this manuscript due to several key issues:

1. The entire paper is poorly organized and written. The introduction, in particular, lacks comprehensiveness and persuasiveness.
2. The title is not appropriate.
3. The abstract requires further improvement. It should provide background information, address central questions/research gaps, outline research goals, summarize main findings/results, and emphasize the significance of the findings.
4. Duplicated sentences have been identified between lines 34 to 45, indicating a need for careful revision and editing.
5. Numerous grammar errors and typos are present throughout the manuscript.
6. In lines 58 and 59, the use of four variables to create the hazard map is mentioned. However, the rationale behind selecting these specific variables is unclear. I recommend that the authors provide clarification or cite relevant references to justify their choice.
7. The flowchart of data analysis depicted in Figure 2 is confusing, making it difficult to understand how the data is processed and analyzed across different blocks. Clarification is needed.
8. The values in columns 4 and 5 in Table 2 do not seem to be correct. Additionally, the unit for area should be “km<sup>2</sup>” for consistency.
9. In Line 86 on Page 6, the authors claimed that “There is a close correlation between slope vulnerability and the level of tsunami hazard”. However, this claim lacks support from associated results.
10. Despite the inclusion of figures and tables in the manuscript, there is a lack of clear references to them within the context of the discussion.
